# Supplementary material for: Beneficiary Experience of Care by Level of Integration in Dual Eligible Special Needs Plans
Source: PubMed Central journal article supplement (PMC11161838; doi:10.1001/jamahealthforum.2024.1383), 2024-06-07
Supplement: jamahealthforum-e241383-s002.pdf [file jamahealthforum-e241383-s002.pdf]

## Data Sharing Statement

Mellor. Beneficiary Experience of Care by Level of Integration in Dual Eligible Special Needs Plans. *JAMA Health Forum*. Published June 07, 2024.

doi:10.1001/jamahealthforum.2024.1383

### Data

**Data available:** No

### Additional Information

**Explanation for why data not available:** The survey data used for this study cannot be shared due to a Data Use Agreement with the Virginia Department of Medical Assistance Services (the funder) that prevents public release of data used for the evaluation of Commonwealth Coordinated Care Plus in order to protect the confidentiality of Medicaid members who participated.
